# Supplementary material for: Flexible Polymer-Ionic Liquid Films for Supercapacitor Applications
Source: MDPI journal article supplement (doi:10.3390/gels9040338), 2023-04-16
Supplement: s1 [file s1]

## Article

# Flexible Polymer-Ionic Liquid Films for Supercapacitor Applications

Christo Novakov <sup>1,\*</sup>, Radostina Kalinova <sup>1</sup>, Svetlana Veleva <sup>2</sup>, Filip Ublekov <sup>1</sup>, Ivaylo Dimitrov <sup>1</sup> and Antonia Stoyanova <sup>2,\*</sup>

<sup>1</sup> Institute of Polymers, Bulgarian Academy of Sciences, Sofia, Acad. G. Bonchev Str., 103, 1113 Sofia, Bulgaria

<sup>2</sup> Institute of Electrochemistry and Energy Systems, Bulgarian Academy of Sciences, Acad. G. Bonchev Str., 10, 1113 Sofia, Bulgaria

\* Correspondence: hnovakov@polymer.bas.bg (C.N.); antonia.stoyanova@iees.bas.bg (A.S.)

## Supporting Information

**Table S1.** Assignment of FTIR spectral bands of pure PVdF-HFP and BMPTFSI [1,17].

|          | IR (cm <sup>-1</sup> ) | Assignment                                          |
|----------|------------------------|-----------------------------------------------------|
| PVdF-HFP | 489                    | Bending and wagging of the CF <sub>2</sub> group    |
|          | 613                    | C-F <sub>2</sub> bending and CCC skeletal vibration |
|          | 762                    | CH <sub>2</sub> rocking vibration                   |
|          | 795                    | CF <sub>3</sub> stretching vibration                |
|          | 840                    | CH <sub>2</sub> rocking                             |
|          | 974                    | C-F stretching                                      |
|          | 1066                   | Vibration of crystalline phase                      |
|          | 1181                   | C-C band stretching                                 |
| BMPTFSI  | 510, 571               | CF <sub>3</sub> asymmetric bending                  |
|          | 598                    | bending CH <sub>3</sub> (N)CN stretching            |
|          | 654                    | C-H vibrational mode of cyclic BMP <sup>+</sup>     |
|          | 740                    | S-N stretching mode                                 |
|          | 793                    | C-C-H bending                                       |
|          | 1051                   | Asymmetric S-N-S stretching                         |
|          | 1132                   | C-SO <sub>2</sub> -N bending                        |
|          | 1349                   | Asymmetric SO <sub>2</sub> stretching               |
|          | 1469                   | CH <sub>2</sub> , CH <sub>3</sub>                   |

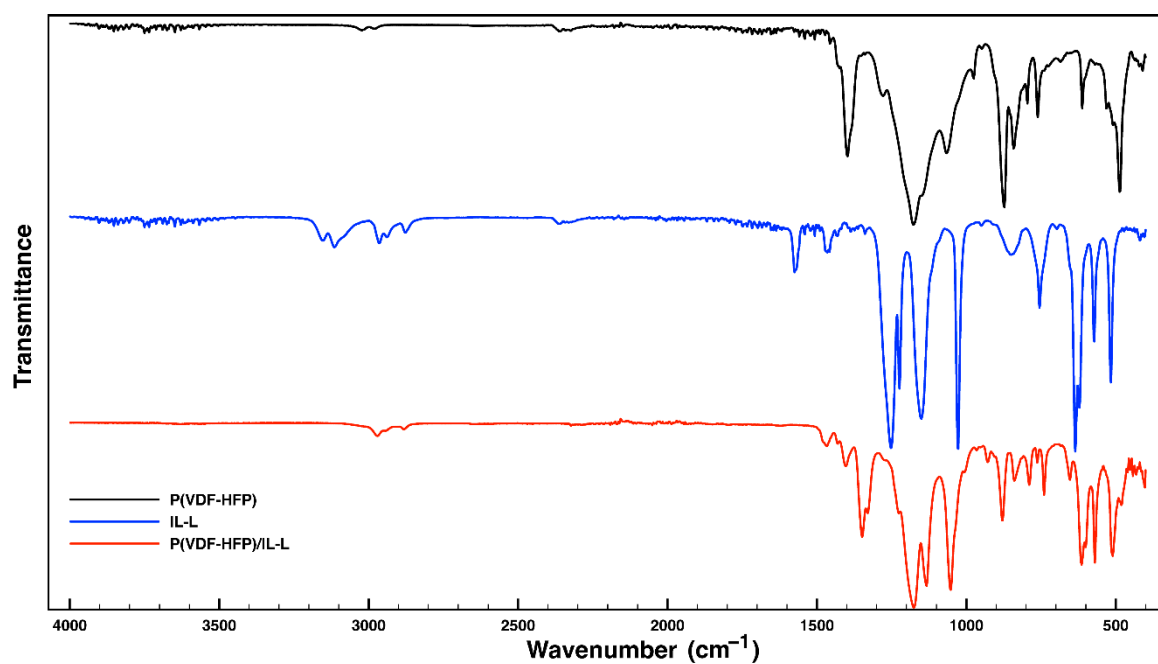

**Figure S1.** FTIR spectra of pure P(VDF-HFP), IL-L and P(VDF-HFP)/IL-L.

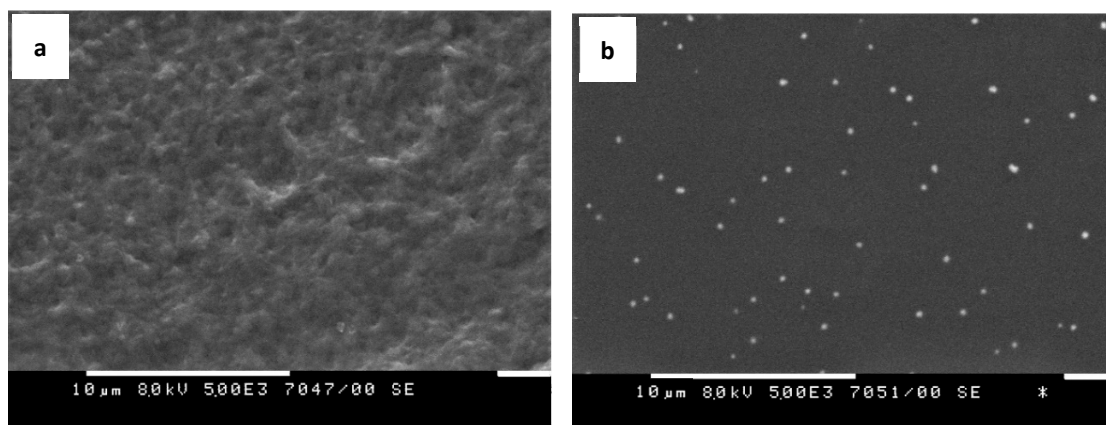

**Figure S2.** SEM images of PVDF-HFP/IL composite membranes: a) cross-linked pure P(VDF-HFP) and b) cross-linked P(VDF-HFP)/IL-L.

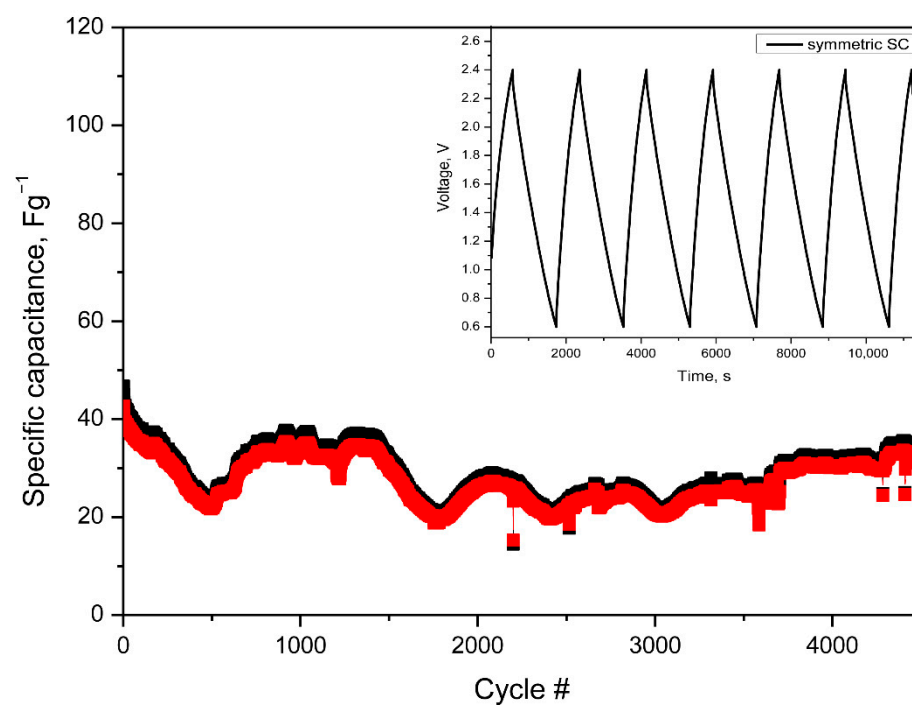

**Figure S3.** Long-term test of symmetric SC cell with P(VDF-HFP)/ IL-L film at a current load of  $60 \text{ mA g}^{-1}$ .
